# Supplementary material for: Chemotherapeutic-caused liver toxicity hinders nanomedicine development
Source: Royal Society of Chemistry journal article supplement (doi:10.1039/d2ra08148b), 2023-01-01
Supplement: d2ra08148b1.pdf [file d2ra08148b1.pdf]

Supplementary Information

## **Chemotherapeutics-caused Liver Toxicity Hinders Nanomedicine Development**

Pengfei Wu <sup>†,‡</sup>, Yuhang Zhang <sup>†,‡</sup>, Shiyao Zhu <sup>†,‡</sup>, Mo Wang <sup>†</sup>, Peng Zhou <sup>†</sup>,  
Guishuan Wang <sup>†,\*</sup>, Wenqing Li <sup>†,\*</sup>

<sup>†</sup> Institute of Reproductive Medicine, School of Medicine, Nantong University,  
Nantong, China, 226000

<sup>‡</sup> P. Wu, Y. Zhang and S. Zhu contributed equally to this work.

\* Corresponding Author. E-mail: [gswang@ntu.edu.cn](mailto:gswang@ntu.edu.cn) (G. Wang) or  
[liwenqing505@ntu.edu.cn](mailto:liwenqing505@ntu.edu.cn) (W. Li).

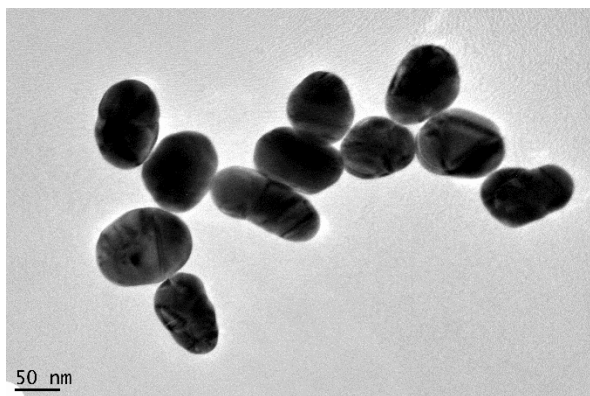

**Figure S1.** TEM image of AuNPs.
